# Supplementary material for: Exploring patients’ views regarding the support and rehabilitation needs of people living with myocardial ischaemia and no obstructive coronary arteries: a qualitative interview study
Source: PubMed Central journal article supplement (PMC11647337; doi:10.1136/bmjopen-2024-086770), 2024-12-10
Supplement: bmjopen-14-12-s001.pdf [file bmjopen-14-12-s001.pdf]

## Do you have a presumed or confirmed diagnosis of:

- Microvascular angina
- Coronary Microvascular dysfunction/disease
- Vasospastic angina
- Coronary Vasospasms
- Coronary Artery Spasms
- Prinzmetal /Variant Angina
- Angina/ischaemia with no obstructive coronary arteries (ANOCA/INOCA)

**We are looking for up to 20 people to take part in a research study involving a 1-hour telephone interview with an experienced researcher.**

The study aims to understand:

- what it is like to live with these conditions
- how you manage your symptoms
- how suitable an existing programme called cardiac rehabilitation (which is offered to people with other types of heart condition) might be for you.

**CONTACT  
US**

**To find out more about the study or how to take part, please email:**

**Dr Helen Humphreys**  
[h.humphreys@shu.ac.uk](mailto:h.humphreys@shu.ac.uk)
